1 **Single-cell analysis reveals a pathogenic cellular module**  
2 **associated with early allograft dysfunction after liver**  
3 **transplantation**

4 Zheng Wang<sup>1†</sup>, Xin Shao<sup>1,2†</sup>, Kai Wang<sup>2,3,4†</sup>, Xiaoyan Lu<sup>1†</sup>, Li Zhuang<sup>5</sup>, Xinyu Yang<sup>2,3</sup>,  
5 Ping Zhang<sup>1</sup>, Penghui Yang<sup>1</sup>, Shusen Zheng<sup>4,5</sup>, Xiao Xu<sup>2,3,4,6\*</sup>, Xiaohui Fan<sup>1,2,6\*</sup>

6 <sup>1</sup> Pharmaceutical Informatics Institute, College of Pharmaceutical Sciences, Zhejiang  
7 University, Hangzhou, 310058, China.

8 <sup>2</sup> The Center for Integrated Oncology and Precision Medicine, Affiliated Hangzhou  
9 First People's Hospital, Zhejiang University School of Medicine, Hangzhou, 310003,  
10 China.

11 <sup>3</sup> Department of Hepatobiliary and Pancreatic Surgery, Affiliated Hangzhou First  
12 People's Hospital, Zhejiang University School of Medicine, Hangzhou, 310003, China.

13 <sup>4</sup> Institute of Organ Transplantation, Zhejiang University, Hangzhou, 310003, China.

14 <sup>5</sup> Department of Hepatobiliary and Pancreatic Surgery, Department of Liver  
15 Transplantation, Shulan (Hangzhou) Hospital, Hangzhou, 310022, China.

16 <sup>6</sup> Westlake Laboratory of Life Sciences and Biomedicine, Hangzhou, 310058, China.

17 †These authors have contributed equally to this work

18 \*Corresponding author: Dr. Xiao Xu (E-mail: [zjxu@zju.edu.cn](mailto:zjxu@zju.edu.cn)) and Dr. Xiaohui Fan  
19 (E-mail: [fanxh@zju.edu.cn](mailto:fanxh@zju.edu.cn), Tel/Fax: 86-571-88208596).

20

21 **Keywords:** liver transplantation; early allograft dysfunction; single-cell RNA  
22 sequencing; mucosal-associated invariant T cell; GZMB<sup>+</sup>GZMK<sup>+</sup> natural killer cell;  
23 S100A12<sup>+</sup> neutrophil

24

25 **ABSTRACT**

26 Liver transplantation (LT) is the standard therapy for patients with end-stage liver  
27 disease. Although LT technology has markedly progressed in recent decades, early  
28 allograft dysfunction (EAD) exacerbates the current organ shortage and impacts the  
29 prognosis of recipients. However, understanding of cellular characteristics and  
30 molecular events contributing to EAD is limited. Here, a large single-cell  
31 transcriptomic atlas of transplanted livers collected from four patients is constructed,  
32 including 58,243 cells, which are classified into 14 cell types and 29 corresponding  
33 subtypes with known markers, including liver parenchymal cells and non-parenchymal  
34 cells with different cell states. Compared to the pre-LT livers, graft remodeling is noted  
35 in the post-LT livers, with marked changes in several immune cells in either cell ratios  
36 or cell states. More importantly, an EAD-associated pathogenic cellular module is  
37 identified, consisting of mucosal-associated invariant T (MAIT) cells, granzyme B  
38 (GZMB)<sup>+</sup> granzyme K (GZMK)<sup>+</sup> natural killer (NK) cells, and S100A12<sup>+</sup> neutrophils,  
39 all of which are elevated in EAD patient after LT. This cellular module is also verified  
40 in two independent datasets. Collectively, these results reveal the cellular  
41 characteristics of transplanted livers and the EAD-associated pathogenic cellular  
42 module at the single-cell level, offering new insights into the EAD occurrence after LT.

43

## 44 INTRODUCTION

45 Liver transplantation (LT) is the most effective treatment for end-stage liver diseases,  
46 and the technology has made great progress over the past several decades.<sup>1</sup> However,  
47 apart from the organ shortage as the major limitation of LT,<sup>2</sup> early allograft dysfunction  
48 (EAD) following LT is considered a critical complication, with an incidence of  
49 approximately 20–40%, seriously affecting the long-term survival rate of allografts and  
50 recipients.<sup>3-7</sup>

51 EAD is a multifactorial complication of LT, and its risk factors include the donor  
52 risk index, surgery-related factors, and Model for End-stage Liver Disease score.<sup>7-9</sup>  
53 Liver ischemia-reperfusion (IR) injury after surgery, a key factor for EAD development,  
54 is a complex process involving immune responses, inflammation, cell damage, and cell  
55 death, all of which are regulated by multiple cell lineages.<sup>7, 10, 11</sup> However, the cellular  
56 heterogeneity, especially changes in the cell states or functions of immune cell  
57 populations, in complex liver diseases has restricted progress in understanding the  
58 detailed cellular characteristics and molecular events underlying the occurrence of EAD  
59 using conventional research methods.<sup>12-14</sup>

60 Recent advances in single-cell RNA sequencing (scRNA-seq) technologies have  
61 enabled the characterization of human liver tissues at high resolution,<sup>12, 13</sup> with great  
62 advantages in the identification of novel cell types/states and molecular events  
63 involving complex physiological and pathological processes.<sup>15-17</sup> In this study, we  
64 aimed to capture cellular heterogeneity using scRNA-seq and elucidate new cellular  
65 and molecular insights into EAD with this high-resolution approach. We constructed  
66 the largest single-cell transcriptomic atlas reported to date from four paired human  
67 transplanted livers before and after LT using scRNA-seq, and further performed module  
68 analysis to identify a pathogenic cellular module highly associated with EAD, which

69 was further confirmed on two independent datasets. These will deepen our  
70 understanding of the cellular characteristics and pathogenic molecular events  
71 associated with EAD occurrence and provide a valuable reference for the prevention  
72 and treatment of EAD after LT.

73

## 74 **MATERIALS AND METHODS**

### 75 **Human liver samples**

76 All samples of transplanted livers were obtained from Shulan Hospital (Hangzhou,  
77 China) with Institutional Review Board approval (No. 2020065-77) and in  
78 conformance with the Helsinki Declaration (as revised in 2013). Written informed  
79 consent was obtained from the patients. No donor livers were obtained from executed  
80 prisoners or other institutionalized persons. Liver tissue samples were collected from  
81 four donors (before LT) with cold perfusion, and samples from the corresponding livers  
82 were collected from four recipient patients without hepatitis virus infection after 2 h of  
83 portal reperfusion.

84

### 85 **Collection of liver samples**

86 After organ procurement, the allograft was fully perfused and preserved with 0–4°C  
87 Custodiol® HTK solution (Beijing, China). Before liver transplantation, 6 × 6 × 6 mm  
88 graft blocks were collected in tissue storage solution (10 mL, Miltenyi, Shanghai, China)  
89 as the preoperative samples (i.e., the ischemic specimen). Subsequently, the allograft  
90 was implanted using the piggyback technique, including the sequential procedures of  
91 inferior vena cava, portal vein, hepatic artery anastomosis, and biliary reconstruction.  
92 The postoperative samples (i.e., the reperfusion specimen) were collected just before  
93 closing the abdomen and stored in the same tissue storage solution (10 mL). All liver

94 samples were subjected to the tissue dissociation process for preparation of single-cell  
95 suspensions.

96

### 97 **Preparation of liver single-cell suspension**

98 The single-cell suspension was prepared with the human tumor cell isolation kit  
99 (Miltenyi) according to the manufacturer's instructions. Briefly, the liver tissue was cut  
100 into pieces and placed into pre-prepared gentleMACS™ C tubes with dissociation  
101 enzyme mix. The appropriate gentleMACS™ program (37C\_h\_TDK\_1) was then  
102 performed to dissociate the tissues for 1 h using the gentleMACS™ Octo dissociator  
103 with heaters. Subsequently, the cell suspension was filtered by a 40 µm nylon cell  
104 strainer (Corning, Shanghai, China) and transferred to a 50 mL centrifuge tube for  
105 centrifugation at 500 g for 3 min. The erythrocytes were lysed using 5 mL ACK lysing  
106 buffer (Gibco, Shanghai, China). Dead cells were removed with a Dead Cell Removal  
107 Kit (Miltenyi) according to the manufacturer's recommendations. Finally, the cell pellet  
108 was washed twice and resuspended in 1 × PBS, the cell viability was calculated by a  
109 trypan blue assay (Gibco), and then placed on ice for subsequent use.

110

### 111 **scRNA-seq**

112 Liver single-cell suspensions were loaded onto the 10x Genomics Chromium chip (10x  
113 Genomics; Pleasanton, CA, USA) to generate droplets. The obtained Gel Beads-in-  
114 emulsion was subjected to reverse transcription using a ProFlex PCR System (Thermo  
115 Fisher, Waltham, MA, USA). The resulting cDNA was purified and amplified.  
116 According to the cDNA concentration quantified by Qubit (Thermo Fisher), libraries  
117 were constructed with a Chromium Single Cell 3' Library & Gel Bead Kit v3 (10x

118 Genomics) following the manufacturer's instructions. All libraries were sequenced by  
119 Novogene (Beijing, China) on the Illumina Novaseq platform.

120

### 121 **Histological analysis**

122 Part of the flat tissue was cut from the liver tissue sample in the preservation solution  
123 and placed immediately in a 10% formalin solution. Tissue sections were cut at 5  $\mu$ m  
124 thickness after being embedded in paraffin, followed by deparaffinization in xylene and  
125 rehydration in 100%, 95%, 90%, 80%, 75% alcohol successively. The sections were  
126 incubated with 3% H<sub>2</sub>O<sub>2</sub>, and nonspecific binding blocking was performed with 5%  
127 bovine serum albumin for 1 h. The sections were stained with hematoxylin and eosin  
128 (H&E) for histological evaluation and performed terminal deoxynucleotidyl  
129 transferase-mediated dUTP nick-end labeling (TUNEL) staining for apoptosis  
130 evaluation. Images were acquired on an Olympus BX63 microscope (Olympus,  
131 Shinjuku, Japan) at 200 $\times$  magnification.

132

### 133 **Immunofluorescence staining**

134 For immunofluorescence staining, liver sections were firstly incubated with primary  
135 antibodies against CD16 (1:500, Abcam, ab246222), FOS (1:500, Abcam, ab208942),  
136 SLC4A10 (1:50, Abcam, ab122229), CD3 (1:100, Abcam, ab16669), CD66b (1:500,  
137 Abcam, ab197678), S100A12 (1:500, Abcam, ab272713), KLRF1 (1:100, Proteintech,  
138 21510-1-AP), Granzyme B (GZMB, 1:100, Invitrogen, MA1-80734), or Granzyme K  
139 (GZMK, 1:250, Abcam, ab282703) at 4°C overnight. After washing in 1 $\times$  PBS with  
140 Tween 20, the appropriate fluorophore-conjugated secondary antibodies include Goat  
141 anti-Rabbit IgG H&L-Alexa Fluor 488 (1:100, Abcam, ab150077), Goat anti-Rabbit  
142 IgG H&L-Alexa Fluor 555 (1:100, Abcam, ab150078), and Goat anti-Rabbit IgG H&L-

143 Alexa Fluor 647 (1:250, Abcam, ab150079) were used for incubation for 1.5 hours at  
144 room temperature. The antifade mounting medium with DAPI (Origene, Cat#ZU9557)  
145 was used for slides mounting. Fluorescence images of mucosal-associated invariant T  
146 (MAIT) cells, S100A12<sup>+</sup> neutrophils, and FOS<sup>+</sup> monocytes were captured with an  
147 Olympus BX63 microscope. Fluorescence images of granzyme B (GZMB)<sup>+</sup> granzyme  
148 K (GZMK)<sup>+</sup> natural killer (NK) cells were scanned by an Olympus SLIDEVIEW  
149 VS200 system.

150

### 151 **Data processing**

152 Raw sequence files were processed with CellRanger 3.0.2 based on the GRCh38  
153 reference for read alignment to generate the raw count data, which were further  
154 processed with Seurat,<sup>18</sup> wherein cells with more than 4,000 unique features or with a  
155 mitochondrial percentage greater than 25% were filtered out to exclude doublets and  
156 dead cells. Gene symbols were revised according to the National Center for  
157 Biotechnology Information gene data (<https://www.ncbi.nlm.nih.gov/gene/>) updated on  
158 April 28, 2020, wherein unmatched genes and duplicated genes were removed.

159

### 160 **Cell type annotation**

161 The raw data were normalized via the LogNormalize function. Principal component  
162 analyses (PCAs) were performed, followed by t-distributed stochastic neighbor  
163 embedding and uniform manifold approximation and projection (UMAP) analysis for  
164 dimensional reduction and clustering analysis. To annotate the cell type for each pre-  
165 computed cluster, scDeepSort<sup>19</sup> and scCATCH<sup>20</sup> were applied to obtain the predicted  
166 cell type for each cluster. Combined with the highly expressed genes and markers, each  
167 cluster was finally assigned a specific cell label.

168

### 169 **Single-cell trajectory analysis**

170 Neutrophils were pre-processed and analyzed with monocle3<sup>21</sup> with default parameters  
171 to generate the trajectory and dissect cellular decisions. The significantly correlated  
172 genes that cells use to navigate these decisions over pseudotime were tracked and  
173 ranked.

174

### 175 **Cellular module analysis**

176 For each patient, modules consisting of GZMB<sup>+</sup> GZMK<sup>+</sup> NK cells, MAIT cells, and  
177 S100A12<sup>+</sup> neutrophils before and after LT were extracted, respectively. The module  
178 score was defined as the total percentage of each cell type in each patient before and  
179 after LT.

180

### 181 **Cell-cell communication analysis**

182 Cell-cell communication analysis was performed with scCrossTalk based on the highly  
183 expressed ligands of sending cells and receptors of receiving cells. For each cell type,  
184 human ligand-receptor pairs recorded in CellTalkDB<sup>22</sup> were applied to filter out the  
185 significantly highly expressed ligands and receptors with a percentage of expressed  
186 cells  $> 25\%$  and  $P < 0.05$  using the  $Z$  score for each gene. For the ligand  $L$  of the sending  
187 cell type  $i$  and the receptor  $R$  of the receiving cell type  $j$ , the interacting score  $S_{(Li-Rj)}$  was  
188 defined as the product of the average expression of  $L$  and  $R$ . A permutation test was  
189 then performed by randomizing the cell labels to re-calculate the interacting score. By  
190 repeating this step 1,000 times, the distribution  $S$  for the  $L$ - $R$  interacting score between  
191 the  $i$  and  $j$  cells was obtained for comparison with the real interacting score, wherein  
192 the  $P$  value was calculated as follows:



193

$$194 \quad P_{(Li-Rj)} = \frac{crad\{x \in S \mid x \geq S_{(Li-Rj)}\}}{1000}$$

195

196 *L-R* pairs with a *P* value <0.05 were selected as the significantly enriched ligand-  
197 receptor interactions underlying the cell-cell communication between the pairwise  
198 sending cell type *i* and receiving cell type *j*.

199

### 200 **Pathway and biological process enrichment**

201 The Metascape web tool (<https://metascape.org/>)<sup>23</sup> was used to perform the enrichment  
202 of pathways and biological processes, wherein the top 100 highly expressed genes were  
203 selected according to the fold change of the average gene expression. Gene set  
204 enrichment analysis<sup>24</sup> was performed using the ranked gene list with *clusterprofiler*<sup>25</sup>  
205 to enrich the significantly activated pathways and biological processes, whose  
206 signatures were obtained from the Molecular Signatures Database v7.4 (MSigDB,  
207 <http://www.gsea-msigdb.org/gsea/msigdb>),<sup>26</sup> including the gene sets from Gene  
208 Ontology (GO) and the canonical pathway gene sets derived from the Kyoto  
209 Encyclopedia of Genes and Genomes, Reactome, and WikiPathways pathway  
210 databases.

211

### 212 **Rat scRNA-seq data analysis**

213 The processed scRNA-seq data matrix of six transplanted rat livers contained 23,675  
214 cells involving 11 cell types.<sup>15</sup> For NK cells, T cells, and granulocytes, the count data  
215 were normalized via LogNormalize, followed by PCA and UMAP analysis for  
216 dimensional reduction and clustering analysis. Pearson's correlation coefficient was

217 used to analyze the correlation of gene expression profiles between human and rat cell  
218 types, wherein the rat gene symbols were transformed to human gene symbols with the  
219 orthologs.

220

### 221 **Bulk RNA-seq data analysis**

222 The raw bulk RNA-seq data matrix of liver cells from eight EAD and non-EAD patients  
223 after LT were downloaded from the Gene Expression Omnibus GSE23649 dataset,  
224 wherein gene expression values less than 0 were transformed to 0. The raw matrix was  
225 normalized by setting the median value to 1000 for each sample and transformed into  
226 a log<sub>2</sub> matrix. To deconvolute the cell type composition of the bulk RNA-seq data, we  
227 used our scRNA-seq data containing 29 subtypes of 58,243 cells as the reference for  
228 RCTD,<sup>27</sup> an R package for assigning cell types to bulk transcriptomics data; 100  
229 representative cells for each subtype were randomly selected and applied in RCTD with  
230 all parameters kept as default.

231

### 232 **Statistical analysis**

233 R (version 3.6.3) and GraphPad Prism 8.0.1 were used for the statistical analyses.  
234 Differences between two groups were determined using Welch's t-test;  $P < 0.05$  was  
235 considered to indicate a significant difference.

236

## 237 **RESULTS**

### 238 **Overview of the single-cell transcriptomic atlas for human transplanted livers**

239 A total of eight liver samples were collected from four donors and four recipients (Table  
240 1) for scRNA-seq using 10x Genomics platform, and blood samples of recipients were  
241 collected for assessment of biochemical indicators (Supplementary Table S1),

242 including alanine aminotransferase (ALT), aspartate aminotransferase (AST), total-  
243 bilirubin (T-Bil), and international normalized ratio (INR) (Fig. 1A). Histopathological  
244 evaluation with H&E and terminal deoxynucleotidyl transferase-mediated dUTP nick-  
245 end labeling (TUNEL) staining showed that liver injuries after LT were further  
246 aggravated compared with those before LT for these patients (Fig. 1B and  
247 Supplementary Fig. S1). According to the international definition of EAD,<sup>6</sup> patient 2  
248 was diagnosed as having EAD since the INR on postoperative day 7 was elevated at  
249 1.74, whereas the other three patients were classified in the non-EAD group (Table 2).

250 After quality control according to the number of unique features and mitochondrial  
251 percentage (Supplementary Fig. S2A), a total of 58,243 cells were included for further  
252 dimensionality reduction and clustering analysis (Supplementary Table S2), which  
253 generated 32 cellular clusters. Combining the predicted cell types of pre-trained  
254 scDeepSort<sup>19</sup> and scCATCH<sup>20</sup> with the highly expressed genes for each cluster, these  
255 32 clusters were classified into 14 main cell types (Fig. 1C): B cells (MS4A1, BANK1),  
256 cholangiocyte (KRT7, KRT19), endothelial cells (FCN3, TSPAN7), erythroid cells  
257 (HBB, HBA1), hepatocytes (AHSG, APOC3), hepatic stellate cells (ACTA2),  
258 macrophages (CD68, MS4A7, MAFB), mast cells (TSPAB1, CPA3), monocytes  
259 (FCGR3B, CXCL8), neutrophils (RETN, CEACAM8), dendritic cells (PLD4,  
260 LILRA4), plasma cells (IGHG1, IGHA1), progenitor cells (TOP2A, ASPM), and T/  
261 natural killer (NK) cells (CD3D, CD3E, KLRC1, GZMB, NCAM1), as shown in Figure  
262 1D.

263 Compared to liver parenchymal cells, a substantial number of liver non-parenchymal  
264 cells were identified in the livers collected both before and after LT, which was  
265 attributed to the specific cell isolation protocol and kit used in our study. Specifically,  
266 T/ natural killer (NK) cells, neutrophils, macrophages, monocytes, and endothelial cells

267 accounted for almost all of the cells obtained before and after LT (Fig. 1E).  
268 Unsurprisingly, these five main cell types exhibited either obviously different cell ratios  
269 or cell states after LT (Fig. 1F and Supplementary Fig. S2B), reflecting the fact that  
270 liver IR injuries are closely related to various types of inflammatory responses (e.g.,  
271 immune cell activation, migration, and infiltration).<sup>28, 29</sup> Notably, the EAD patient  
272 (patient 2) had a portion of T/NK cells with different cell states and a larger percentage  
273 of neutrophils after LT compared with those of the other three non-EAD patients (Fig.  
274 1G), suggesting the crucial role of T/NK cell and neutrophil subtypes or substates  
275 during the graft remodeling after LT.

276

### 277 **High-resolution analysis of T/NK cell reveal unique cellular composition in** 278 **patients after LT**

279 According to the unique transcriptomic signatures, T/NK cells were divided into nine  
280 subtypes including mucosal-associated invariant T (MAIT), CD8<sup>+</sup> GZMB<sup>+</sup> T, CD8<sup>+</sup>  
281 GZMK<sup>+</sup> T, NKT, GZMB<sup>+</sup> NK, GZMK<sup>+</sup> NK, and GZMB<sup>+</sup> GZMK<sup>+</sup> NK cells (Fig. 2A).  
282 T cells, NK cells, and NKT cells are known to be involved in immune activation triggered  
283 by IR injury.<sup>30</sup> Concordantly, CD8<sup>+</sup>GZMB<sup>+</sup> T, GZMB<sup>+</sup>GZMK<sup>+</sup> NK, and NKT cells all  
284 exhibited markedly increased proportions after LT (Fig. 2B). Notably, the proportion  
285 of MAIT cells decreased in the non-EAD patients (patients 1, 3, and 4) but increased in  
286 the EAD patient (patient 2) after LT (Fig. 2C, D and Supplementary Fig. S3). The  
287 proportion of GZMB<sup>+</sup>GZMK<sup>+</sup> NK cells also remarkably increased in the EAD patient  
288 compared with that detected in the other, non-EAD, patients (Fig. 2C, E and  
289 Supplementary Fig. S4). Although a unique composition of T/NK cell subtypes was  
290 observed in patient 3 (non-EAD), largely contributing to the observed increases of  
291 CD8<sup>+</sup>GZMB<sup>+</sup> T cells and NKT cells after LT (Fig. 2C), the gene expression profiles of

292 these cells after LT resembled those of the T/NK subtypes before LT (Fig. 2F).  
293 However, GZMB<sup>+</sup>GZMK<sup>+</sup> NK and MAIT cells after LT showed a dissimilar  
294 transcriptomic profile compared with those of the other subtypes before LT (Fig. 2F),  
295 suggesting specific functions of GZMB<sup>+</sup>GZMK<sup>+</sup> NK cells and MAIT cells in  
296 transplanted livers.

297 Next, we analyzed the highly expressed genes of GZMB<sup>+</sup>GZMK<sup>+</sup> NK and MAIT  
298 cells as well as their enriched pathways and biological processes using Metascape<sup>23</sup> to  
299 identify their specific functions (Supplementary Table S3). The genes upregulated in  
300 both of these cell types were significantly related with regulation of the defense  
301 response, lymphocyte activation, cytokine signaling in the immune system, and the IL-  
302 18 signaling pathway (Fig. 2G). Both MAIT and GZMB<sup>+</sup>GZMK<sup>+</sup> NK cells were also  
303 prominently associated with immunoregulatory interactions between lymphoid and  
304 non-lymphoid cells (Fig. 2G), suggesting a vital role of these established injury-  
305 associated specific T/NK cell subtypes (MAIT and GZMB<sup>+</sup>GZMK<sup>+</sup> NK cells) in the  
306 EAD patient via cell-cell interactions (CCIs) in the transplanted liver microenvironment.  
307

### 308 **Key pro-inflammatory effect of S100A12<sup>+</sup> neutrophils in patient 2 after LT**

309 Given the enriched neutrophils in the EAD patient after LT (Fig. 1G), we further  
310 classified these cells into S100A12<sup>+</sup> and S100A12<sup>-</sup> neutrophils according to the  
311 expression level of S100A12, a protein highly associated with neutrophil activities<sup>31</sup>  
312 (Fig. 3A). The increased S100A12<sup>+</sup> neutrophils after LT were mainly distributed in  
313 patient 2, implying a specific distribution of postoperative S100A12<sup>+</sup> neutrophils  
314 associated with EAD (Fig. 3B, C). To further confirm the state transition of S100A12<sup>+</sup>  
315 neutrophils from S100A12<sup>-</sup> neutrophils, single-cell trajectory analysis was performed  
316 with monocle<sup>321</sup> to dissect cellular decisions, demonstrating a single branch from the

317 root (S100A12<sup>-</sup> neutrophils) to the end state, namely S100A12<sup>+</sup> neutrophils (Fig. 3D).  
318 Based on the reconstructed pseudotime trajectory, significantly correlated genes that  
319 cells use to navigate the decision over pseudotime were tracked and ranked, generating  
320 the top three pseudotime-associated genes: *S100A12*, *LTF*, and *PRTN3* (Fig. 3E). These  
321 findings are consistent with the differentially expressed genes (DEGs) identified  
322 between S100A12<sup>+</sup> and S100A12<sup>-</sup> neutrophils, wherein *S100A12* and *LTF* are markers  
323 of S100A12<sup>+</sup> neutrophils and *PRTN3* is a marker of S100A12<sup>-</sup> neutrophils (Fig. 3F and  
324 Supplementary Table S3).

325 Enrichment analyses showed that activated S100A12<sup>+</sup> neutrophils are strongly  
326 related to neutrophil degranulation, migration, and the NF-kappa B signaling pathway,  
327 demonstrating distinct functions from S100A12<sup>-</sup> neutrophils (Fig. 3F), consistent with  
328 the previous findings that S100A12, a damage-associated molecular pattern protein, is  
329 a sensitive marker for inflammation in various inflammatory disorders.<sup>31</sup> Collectively,  
330 these results indicated that a non-negligible inflammatory response induced by  
331 increased S100A12<sup>+</sup> neutrophils occurred in the transplanted liver of patient 2 (Fig. 3G  
332 and Supplementary Fig. S5), which may accelerate EAD progression.

333

### 334 **Subtype classification of mononuclear phagocytes and endothelial cells**

335 Mononuclear phagocytes, comprising monocytes and macrophages, are major cell  
336 types in the immune remodeling of transplanted livers.<sup>32</sup> Monocytes were divided into  
337 CD14<sup>+</sup>, CD16<sup>+</sup>, FOS<sup>+</sup>, and FOS<sup>-</sup> monocytes (Supplementary Fig. S6A and Table S3).  
338 FOS<sup>+</sup> monocytes showed a dramatic increase after LT (Supplementary Fig. S6B),  
339 which was most strongly detected in patient 3 (Supplementary Fig. S6C, D). FOS, also  
340 known as C-FOS, is a subunit of the AP-1 transcription factor complex, thereby  
341 promoting the transcription of genes encoding inflammatory mediators.<sup>33</sup> The

342 expression level of FOS is low in human resting monocytes and is increased in response  
343 to acute inflammatory stimulation,<sup>33, 34</sup> indicating that activated monocytes-induced  
344 acute inflammation occurred in the transplanted liver of patient 3, whereas it seems to  
345 have no relationship with EAD. Macrophages were assigned to three subtypes,  
346 monocyte-derived macrophages, inflammatory Kupffer cells, and non-inflammatory  
347 Kupffer cells, with no obvious differences observed between the EAD patient and non-  
348 EAD patients (Supplementary Fig. S7A, B).

349 Endothelial cells were further classified into liver sinusoidal endothelial cells  
350 (LSECs) and vascular endothelial cells according to the transcriptome characteristics  
351 (Supplementary Fig. S8A and Table S3). The numbers of LSECs decreased after LT due  
352 to IR injuries. For each patient, LSECs occupied a small proportion both before and  
353 after LT, except for patient 4 (Supplementary Fig. S8B). These results indicated that  
354 graft remodeling is accompanied by damage of LSECs, accordant with the previous  
355 findings.<sup>35, 36</sup>

356

### 357 **Identification of a unique pathogenic cellular module associated with EAD**

358 Compared with those of the non-EAD patients, the cellular module consisting of MAIT  
359 cells, GZMB<sup>+</sup>GZMK<sup>+</sup> NK cells, and S100A12<sup>+</sup> neutrophils demonstrated a specific and  
360 markedly increased tendency in the EAD patient (patient 2) after LT (Fig. 4A), and the  
361 highest module score was obtained for the EAD patient after LT (Fig. 4B). Therefore,  
362 we hypothesized that these three cell subtypes constitute a unique pathogenic cellular  
363 module related to the occurrence of EAD. Among the biochemical parameters, the  
364 EAD-associated pathogenic cellular module most highly corresponded to the level of  
365 INR (Fig. 4C). Furthermore, comparison of the DEGs in this pathogenic cellular  
366 module in the EAD patient and non-EAD patients showed that the EAD patient's

367 module after LT was significantly enriched in processes of neutrophil degranulation  
368 and migration, leukocyte cell-cell adhesion, and lymphocyte activation, which were not  
369 associated with the modules of non-EAD patients after LT (Fig. 4D and Supplementary  
370 Table S3).

371 Given the crucial role of hepatocytes and LSECs in the maintenance of hepatic  
372 normal physiological functions and the finding of enriched immunoregulatory  
373 interactions between lymphoid and non-lymphoid cell, we next analyzed CCIs based  
374 on CellTalkDB<sup>22</sup> between the pathogenic cellular module and hepatocytes as well as  
375 LSECs, integrated for the EAD patient and non-EAD patients, respectively (Fig. 5A).  
376 More ligand-receptor interactions were detected between GZMB<sup>+</sup>GZMK<sup>+</sup> NK cells,  
377 MAIT cells, and S100A12<sup>+</sup> neutrophils and hepatocytes/LSECs in the EAD patient than  
378 that in the non-EAD patients (Fig. 5B).

379 In particular, the EAD patient showed specific CCIs among these cells (Fig. 5C)  
380 through several unique ligand-receptor pairs, which were the same for the interactions  
381 of GZMB<sup>+</sup>GZMK<sup>+</sup> NK cells and MAIT cells with LSECs/hepatocytes (Fig. 5D). Four  
382 identical ligand-receptor pairs were found for CCIs from all three cell types to  
383 LSECs/hepatocytes in the EAD patient, demonstrating similar enhancement effects of  
384 this cellular module (Fig. 5D): HMGB1-THBD, CALM1-AQP1, GNAI2-S1PR1, and  
385 GNAI2-CAV1.

386 Finally, distinct differences in functions of LSECs/hepatocytes in EAD were  
387 identified according to the significantly upregulated DEGs between EAD and non-EAD  
388 patients (Supplementary Table S3), which were related to cell death, cell motility, and  
389 autophagy (Fig. 5E), indicating that the pathogenic cellular module may promote EAD  
390 by altering the states of LSECs/hepatocytes.

391



## 392 **Validation of the EAD-associated pathogenic cellular module**

393 Due to the limited number of EAD cases, we further verified the pathogenic cellular  
394 module in two independent datasets. In the scRNA-seq dataset of six rat livers after  
395 LT<sup>15</sup> (Fig. 6A), a cluster denoting *Gzmb*<sup>+</sup> *Gzmk*<sup>+</sup> NK cells (cluster 2 of NK cell) was  
396 identified, and the gene expression profile strongly correlated with that of the  
397 GZMB<sup>+</sup>GZMK<sup>+</sup> NK cells in our data (Fig. 6B and Supplementary Fig. S9A). The  
398 granulocyte subtype (cluster 2) specifically expressed the ortholog marker genes of  
399 human S100A12<sup>+</sup> neutrophils, including *Lcn2*, *Camp9*, *Mmp9*, *Mmp8*, *S100a8*, and  
400 *S100a9* (Figs. 6C, 3F, and 5D). Moreover, the gene expression profiles of the  
401 granulocyte cluster 2 showed the strongest correlation with those of human S100A12<sup>+</sup>  
402 neutrophils among all clusters in the rat data (Fig. 6D and Supplementary Figure S9B).  
403 Nevertheless, both GZMB<sup>+</sup>GZMK<sup>+</sup> NK cells and S100A12<sup>+</sup> neutrophils were present  
404 in the six rat livers after LT (Fig. 6E), indicating a common cellular mechanism across  
405 species.

406 Next, we analyzed another liver bulk RNA-seq dataset from eight EAD patients and  
407 eight non-EAD patients after LT (Fig. 6F). Deconvolution of bulk data with RCTD<sup>27</sup>  
408 was used to obtain the proportions of each cell type. The pathogenic cellular module  
409 consisting of MAIT cells, GZMB<sup>+</sup>GZMK<sup>+</sup> NK cells, and S100A12<sup>+</sup> neutrophils was  
410 present in all patients after LT (Fig. 6F); however, the module scores in the eight EAD  
411 patients were significantly higher than those in the non-EAD patients, according to a  
412 one-tailed Welch's t-test (Fig. 6F). Furthermore, the functions of upregulated genes in  
413 the eight EAD patients obtained by Gene Set Enrichment Analysis<sup>24</sup> were related to the  
414 IL18 signaling pathway, lymphocyte activation, neutrophil chemotaxis, and neutrophil  
415 extracellular trap formation, in line with the enriched pathways of MAIT cells,  
416 GZMB<sup>+</sup>GZMK<sup>+</sup> NK cells, and S100A12<sup>+</sup> neutrophils from our single-cell data

417 (compare Figs. 2G and 3F with Fig. 6G and 6H). Specifically, MAIT cells and  
418 GZMB<sup>+</sup>GZMK<sup>+</sup> NK cells showed high expression of genes related to the IL18  
419 signaling pathway and lymphocyte activation (*IRF1*, *IL18*, *RAP*, and *TNFAIP3*),  
420 whereas S100A12<sup>+</sup> neutrophils showed high expression of *S100A8* and *S100A9* in our  
421 single-cell data (Fig. 6I), which are related to neutrophil chemotaxis and extracellular  
422 trap formation that were significantly activated in these eight EAD patients. These  
423 consistent results confirmed the high association of the unique pathogenic cellular  
424 module in transplanted livers after LT with EAD occurrence.

425

## 426 **DISCUSSION**

427 In this study, we constructed the largest single-cell transcriptomic atlas of transplanted  
428 livers before and after LT, containing 58,243 liver cells from EAD and non-EAD  
429 patients and revealing a pathogenic cellular module consisting of MAIT cells,  
430 GZMB<sup>+</sup>GZMK<sup>+</sup> NK cells, and S100A12<sup>+</sup> neutrophils that is highly associated with the  
431 occurrence of EAD. This cellular module and its association with EAD occurrence were  
432 further verified in two independent LT datasets (rat and human).

433 The MAIT cells in the pathogenic module represent a novel and enriched population  
434 of innate immune cells in the human liver, which play complex roles in multiple liver  
435 diseases, including alcoholic/non-alcoholic/autoimmune liver disease, viral hepatitis,  
436 and liver cancer.<sup>37,38</sup> Specifically, MAIT cells play anti-bacterial roles in alcoholic liver  
437 disease, contribute to liver fibrosis by promoting hepatic stellate cell activation, and  
438 increase liver inflammation to further induce anti-inflammatory macrophage  
439 polarization. In this study, MAIT cells in transplanted livers were associated with  
440 immune regulation effects according to the high expression levels of associated genes

441 such as *LTB*, *CCR6*, *IL4I1*, and *CCL20*, along with significant enrichment of  
442 lymphocyte activation, leukocyte proliferation, and cytokine production and signaling.

443 NK cells are the most abundant population of lymphocytes in the human liver, which  
444 are further recruited to the injury region to amplify the inflammatory response.<sup>39, 40</sup>  
445 Although GZMB and GZMK are serine proteases known to be activated in NK cells,  
446 which could induce target cell apoptosis by caspase activation,<sup>41, 42</sup> we identified a  
447 subtype of NK cells, GZMB<sup>+</sup>GZMK<sup>+</sup> NK cells, in transplanted livers, which was more  
448 strongly associated with EAD occurrence compared to the GZMB<sup>+</sup> NK or GZMK<sup>+</sup> NK  
449 cells, suggesting the critical effects of GZMB<sup>+</sup>GZMK<sup>+</sup> NK cells in liver graft  
450 remodeling.

451 S100A12<sup>+</sup> neutrophils were also associated with the pathogenic EAD module.  
452 Human S100A12 is almost exclusively expressed and secreted by neutrophils and is  
453 dramatically overexpressed at inflammation sites.<sup>43</sup> However, reports of S100A12 in  
454 liver disease mainly involve hepatocellular carcinoma and primary sclerosing  
455 cholangitis disease.<sup>44, 45</sup> Herein, we identified S100A12<sup>+</sup> neutrophils in transplanted  
456 livers, which may aggravate graft injury through pro-inflammatory effects.

457 The pathogenic cellular module identified in this study, including MAIT cells,  
458 GZMB<sup>+</sup>GZMK<sup>+</sup> NK cells, and S100A12<sup>+</sup> neutrophils, was also found in the two  
459 independent datasets, highlighting the universality of this module in transplanted livers  
460 across different species and platforms. The main difference was that MAIT cells were  
461 hardly observed in the rat transplanted livers (Supplementary Fig. S9C), which was not  
462 surprising as these cells are reported to be enriched in humans and much less abundant  
463 in murine species.<sup>46, 47</sup> Moreover, the enriched pathways and biological processes of the  
464 pathogenic module were similar to that obtained from the independent human dataset  
465 with eight EAD patients, including lymphocyte and neutrophil activation as well as

466 their associated immune response, inflammation, cytotoxicity, and tissue damage,  
467 which are reported as risk factors of EAD occurrence.<sup>7, 31, 38, 41, 42</sup>

468 Patient 2, who was the only patient diagnosed with EAD in our study based on the  
469 high level of INR, passed away two weeks after LT due to multiple organ failure. As a  
470 prothrombin time-related indicator, INR is used to evaluate the severity and prognosis  
471 of acute liver failure, and its increase is a critical feature of advanced liver failure as  
472 prothrombin time will not be extended until 80% of synthetic ability is lost.<sup>48</sup>  
473 Collectively, our results suggest that the EAD-associated pathogenic cellular module  
474 might mainly contribute to prothrombin-associated liver injury in EAD, whereas it  
475 needs further exploration.

476 Overall, we have proposed a pathogenic cellular module associated with the  
477 occurrence of EAD after LT at the single-cell resolution, providing new insights into  
478 the understanding of EAD. Intervention in this pathogenic cellular module might be a  
479 novel direction for preventing the occurrence of EAD.

480

#### 481 **DATA AND CODE AVAILABILITY**

482 The accession number for the raw and processed counts data reported in this paper is  
483 Gene Expression Omnibus (GEO, <https://www.ncbi.nlm.nih.gov/geo/>): GSE189539.

484 The bulk RNA-seq data of liver samples for eight EAD and non-EAD patients after LT  
485 were collected from GEO: GSE23649. The scRNA-seq data of six rat transplanted  
486 livers are accessible at Genome Sequence Archive (<https://ngdc.cnbc.ac.cn/gsa/>):  
487 CRA004061. Analysis scripts for the scRNA-seq data processing pipeline are available  
488 at the Satija Lab tutorial (<https://satijalab.org/seurat>). Source codes for the scCrossTalk  
489 R package are provided on GitHub (<https://github.com/ZJUFanLab/scCrossTalk>).

490

491 **ACKNOWLEDGMENTS**

492 This work was financially supported by the National Natural Science Foundation of  
493 China (81973701, 81903767), the Natural Science Foundation of Zhejiang Province  
494 (LZ20H290002), the Innovation Team and Talents Cultivation Program of National  
495 Administration of Traditional Chinese Medicine (No: ZYYCXTD-D-202002), the Key  
496 Program, National Natural Science Foundation of China (81930016), the National Key  
497 R&D Program of China (2021YFA1100500), and the China Postdoctoral Science  
498 Foundation (2021M702828). We thank the Novogene Biotechnology Co., LTD  
499 (Tianjin, China) and Morphological Platform of Zhejiang University School of  
500 Medicine (Hangzhou, China) for their technical support.

501

502 **AUTHOR CONTRIBUTIONS**

503 Z.W. designed, performed, and analyzed all experiments; X.S. processed scRNA-seq  
504 data and performed computational analysis; K.W. and P.Z. participated in the  
505 experiment; Z.W. and X.S. wrote the manuscript; X.Y. provided the scRNA-seq matrix  
506 of rat livers. X.L., L.Z., S.Z., X.X., and X.F. supported and supervised the experiment  
507 and revised the manuscript; X.F. and X.X. conceptualized the study. All the authors  
508 reviewed the manuscript.

509

510 **COMPRTING INTERESTS**

511 The authors declare no competing interests.

512

513 **REFERENCES**

- 514 1. Yang LS, et al. Liver transplantation: a systematic review of long-term quality of  
515 life. *Liver Int* **34**, 1298-1313 (2014).  
516 2. Jadowiec CC, Taner T. Liver transplantation: Current status and challenges. *World*

- 517 *J Gastroenterol* **22**, 4438-4445 (2016).
- 518 3. Olthoff KM, et al. Validation of a current definition of early allograft dysfunction  
519 in liver transplant recipients and analysis of risk factors. *Liver Transpl* **16**, 943-949  
520 (2010).
- 521 4. Lee DD, et al. Early allograft dysfunction in liver transplantation with donation  
522 after cardiac death donors results in inferior survival. *Liver Transpl* **20**, 1447-1453  
523 (2014).
- 524 5. Wang K, et al. A two-circular RNA signature of donor circFOXN2 and  
525 circNECTIN3 predicts early allograft dysfunction after liver transplantation. *Ann*  
526 *Transl Med* **8**, 94 (2020).
- 527 6. Agopian VG, et al. Evaluation of Early Allograft Function Using the Liver Graft  
528 Assessment Following Transplantation Risk Score Model. *JAMA Surg* **153**, 436-444  
529 (2018).
- 530 7. Zhou J, et al. The Role of Ischemia/Reperfusion Injury in Early Hepatic Allograft  
531 Dysfunction. *Liver Transpl* **26**, 1034-1048 (2020).
- 532 8. Feng S, et al. Characteristics associated with liver graft failure: the concept of a  
533 donor risk index. *Am J Transplant* **6**, 783-790 (2006).
- 534 9. Malinchoc M, et al. A model to predict poor survival in patients undergoing  
535 transjugular intrahepatic portosystemic shunts. *Hepatology* **31**, 864-871 (2000).
- 536 10. Kageyama S, et al. Serelaxin induces Notch1 signaling and alleviates  
537 hepatocellular damage in orthotopic liver transplantation. *Am J Transplant* **18**, 1755-  
538 1763 (2018).
- 539 11. Wang Z, et al. Protective effects of Ginkgo Biloba Dropping Pills against liver  
540 ischemia/reperfusion injury in mice. *Chin Med* **15**, 122 (2020).
- 541 12. Aizarani N, et al. A human liver cell atlas reveals heterogeneity and epithelial  
542 progenitors. *Nature* **572**, 199-204 (2019).
- 543 13. MacParland SA, et al. Single cell RNA sequencing of human liver reveals distinct  
544 intrahepatic macrophage populations. *Nat Commun* **9**, 4383 (2018).
- 545 14. Saviano A, Henderson NC, Baumert TF. Single-cell genomics and spatial  
546 transcriptomics: Discovery of novel cell states and cellular interactions in liver  
547 physiology and disease biology. *J Hepatol* **73**, 1219-1230 (2020).
- 548 15. Yang X, et al. Single-cell profiling reveals distinct immune phenotypes that  
549 contribute to ischaemia-reperfusion injury after steatotic liver transplantation. *Cell*  
550 *Prolif* **54**, e13116 (2021).
- 551 16. Zheng C, et al. Landscape of Infiltrating T Cells in Liver Cancer Revealed by  
552 Single-Cell Sequencing. *Cell* **169**, 1342-1356 e1316 (2017).
- 553 17. Martini E, et al. Single-Cell Sequencing of Mouse Heart Immune Infiltrate in  
554 Pressure Overload-Driven Heart Failure Reveals Extent of Immune Activation.  
555 *Circulation* **140**, 2089-2107 (2019).
- 556 18. Butler A, et al. Integrating single-cell transcriptomic data across different  
557 conditions, technologies, and species. *Nat Biotechnol* **36**, 411-420 (2018).
- 558 19. Shao X, et al. scDeepSort: a pre-trained cell-type annotation method for single-cell

- 559 transcriptomics using deep learning with a weighted graph neural network. *Nucleic*  
560 *Acids Res*, (2021).
- 561 20. Shao X, et al. scCATCH: Automatic Annotation on Cell Types of Clusters from  
562 Single-Cell RNA Sequencing Data. *iScience* **23**, 100882 (2020).
- 563 21. Trapnell C, et al. The dynamics and regulators of cell fate decisions are revealed  
564 by pseudotemporal ordering of single cells. *Nat Biotechnol* **32**, 381-386 (2014).
- 565 22. Shao X, et al. CellTalkDB: a manually curated database of ligand-receptor  
566 interactions in humans and mice. *Brief Bioinform* **22**, (2021).
- 567 23. Zhou Y, et al. Metascape provides a biologist-oriented resource for the analysis of  
568 systems-level datasets. *Nat Commun* **10**, 1523 (2019).
- 569 24. Subramanian A, et al. Gene set enrichment analysis: a knowledge-based approach  
570 for interpreting genome-wide expression profiles. *Proc Natl Acad Sci U S A* **102**, 15545-  
571 15550 (2005).
- 572 25. Yu G, et al. clusterProfiler: an R package for comparing biological themes among  
573 gene clusters. *OMICS* **16**, 284-287 (2012).
- 574 26. Liberzon A, et al. Molecular signatures database (MSigDB) 3.0. *Bioinformatics* **27**,  
575 1739-1740 (2011).
- 576 27. Cable DM, et al. Robust decomposition of cell type mixtures in spatial  
577 transcriptomics. *Nat Biotechnol*, (2021).
- 578 28. Zhou H, et al. TGR5/Cathepsin E signaling regulates macrophage innate immune  
579 activation in liver ischemia and reperfusion injury. *Am J Transplant* **21**, 1453-1464  
580 (2021).
- 581 29. Yazdani HO, et al. Exercise Training Decreases Hepatic Injury and Metastases  
582 Through Changes in Immune Response to Liver Ischemia/Reperfusion in Mice.  
583 *Hepatology* **73**, 2494-2509 (2021).
- 584 30. Zhai Y, et al. Ischaemia-reperfusion injury in liver transplantation--from bench to  
585 bedside. *Nat Rev Gastroenterol Hepatol* **10**, 79-89 (2013).
- 586 31. Kallinich T, et al. Neutrophil-derived S100A12 as novel biomarker of  
587 inflammation in familial Mediterranean fever. *Ann Rheum Dis* **69**, 677-682 (2010).
- 588 32. Strauss O, et al. The immunophenotype of antigen presenting cells of the  
589 mononuclear phagocyte system in normal human liver--a systematic review. *J Hepatol*  
590 **62**, 458-468 (2015).
- 591 33. Guha M, Mackman N. LPS induction of gene expression in human monocytes. *Cell*  
592 *Signal* **13**, 85-94 (2001).
- 593 34. Sariban E, Luebbers R, Kufe D. Transcriptional and posttranscriptional control of  
594 c-fos gene expression in human monocytes. *Mol Cell Biol* **8**, 340-346 (1988).
- 595 35. Dar WA, et al. Ischaemia reperfusion injury in liver transplantation: Cellular and  
596 molecular mechanisms. *Liver Int* **39**, 788-801 (2019).
- 597 36. Poisson J, et al. Liver sinusoidal endothelial cells: Physiology and role in liver  
598 diseases. *J Hepatol* **66**, 212-227 (2017).
- 599 37. Heymann F, Tacke F. Immunology in the liver--from homeostasis to disease. *Nat*  
600 *Rev Gastroenterol Hepatol* **13**, 88-110 (2016).

- 601 38. Zhang Y, Kong D, Wang H. Mucosal-Associated Invariant T cell in liver diseases.  
602 *Int J Biol Sci* **16**, 460-470 (2020).
- 603 39. Yamagiwa S, Kamimura H, Ichida T. Natural killer cell receptors and their ligands  
604 in liver diseases. *Med Mol Morphol* **42**, 1-8 (2009).
- 605 40. Fahrner R, et al. Role of NK, NKT cells and macrophages in liver transplantation.  
606 *World J Gastroenterol* **22**, 6135-6144 (2016).
- 607 41. Kurschus FC, et al. Membrane receptors are not required to deliver granzyme B  
608 during killer cell attack. *Blood* **105**, 2049-2058 (2005).
- 609 42. Hink-Schauer C, et al. The 2.2-A crystal structure of human pro-granzyme K  
610 reveals a rigid zymogen with unusual features. *J Biol Chem* **277**, 50923-50933 (2002).
- 611 43. Pietzsch J, Hoppmann S. Human S100A12: a novel key player in inflammation?  
612 *Amino Acids* **36**, 381-389 (2009).
- 613 44. Cai H, et al. High expression of S100A12 on intratumoral stroma cells indicates  
614 poor prognosis following surgical resection of hepatocellular carcinoma. *Oncol Lett* **16**,  
615 5398-5404 (2018).
- 616 45. Vesterhus M, et al. Novel serum and bile protein markers predict primary sclerosing  
617 cholangitis disease severity and prognosis. *J Hepatol* **66**, 1214-1222 (2017).
- 618 46. Legoux F, Salou M, Lantz O. MAIT Cell Development and Functions: the  
619 Microbial Connection. *Immunity* **53**, 710-723 (2020).
- 620 47. Godfrey DI, et al. The biology and functional importance of MAIT cells. *Nat*  
621 *Immunol* **20**, 1110-1128 (2019).
- 622 48. Agrawal S, Dhiman RK, Limdi JK. Evaluation of abnormal liver function tests.  
623 *Postgrad Med J* **92**, 223-234 (2016).

624

625



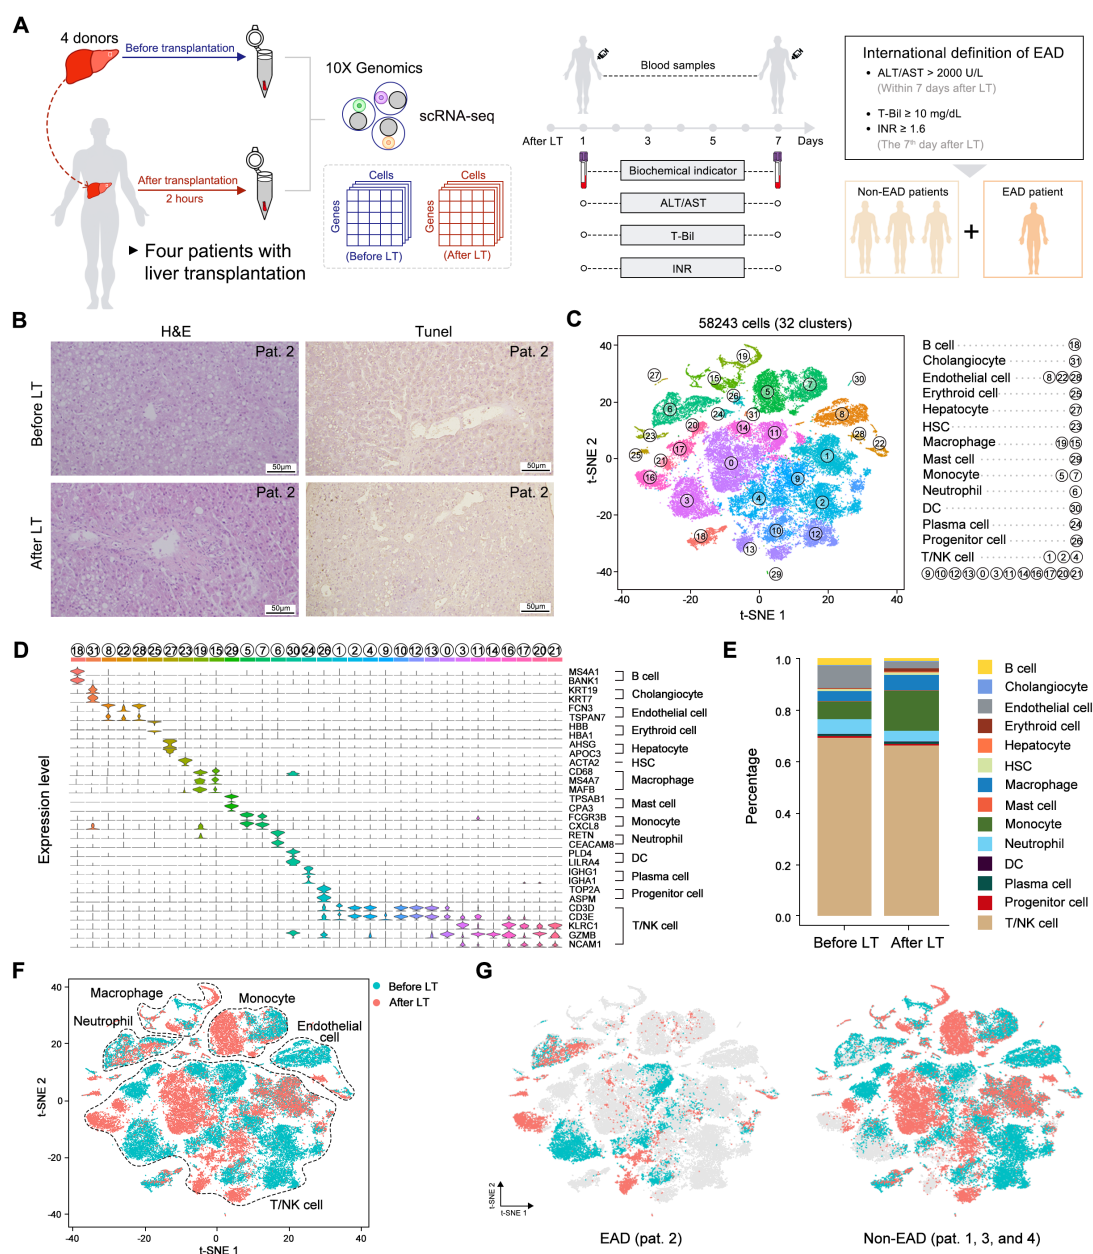

626

627 **Fig. 1** Single-cell transcriptomics atlas of human transplanted livers before and after  
 628 LT. **(A)** An overview of the experimental design. Liver samples with cold perfusion  
 629 and 2 hours after portal reperfusion were collected for scRNA-seq using the 10x  
 630 Genomics platform followed by the collection of biomedical indicators with the first  
 631 week. **(B)** H&E and TUNEL staining of transplanted livers in patient 2 before and after  
 632 LT. The scale bar = 50 μM. **(C)** The t-SNE plot of 32 cell clusters involving 58243  
 633 cells. **(D)** Violin plot of the representative marker genes for the 14 main cell types across

634 32 clusters. The expression level is the normalized count, namely the log<sub>1p</sub> value. **(E)**  
635 Ratio of cell number for the 14 main cell types among all liver cells before and after  
636 LT. **(F)** Distribution of endothelial cell, monocyte, macrophage, neutrophil, and T/NK  
637 cell before and after LT. **(G)** Difference of cells for the EAD and Non-EAD patients.  
638 The grey represents cells from other patients.  
639

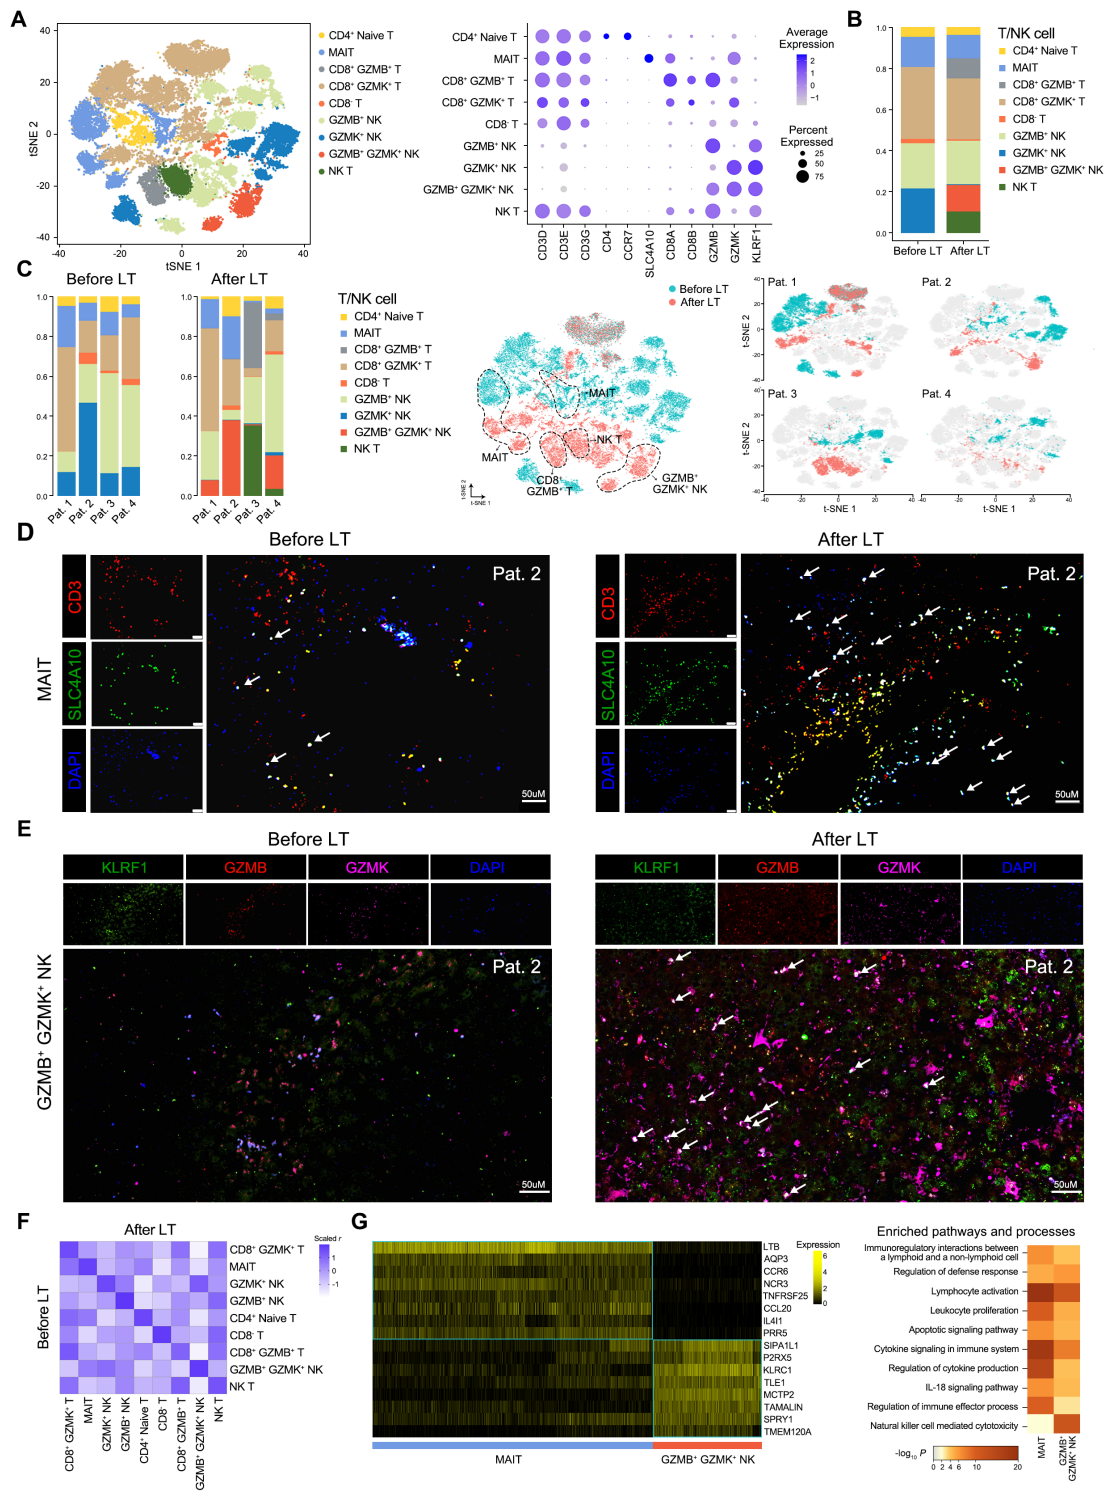

640

641 **Fig. 2** Distinct composition of T/NK cell subtypes in patients after LT. (A) Nine  
 642 subtypes of T/NK cells (left). Known classical marker genes used to classify the nine  
 643 subtypes (middle). (B) Ratio of cell number for the T/NK cell subtypes among T/NK  
 644 cells before and after LT. (C) Ratio of cell number for the T/NK cell subtypes among

645 T/NK cells across patients before and after LT. In the two-dimensional t-SNE plot, for  
 646 each patient (right), the grey represents cells from other patients. **(D and E)**  
 647 Immunofluorescent staining of MAIT cells **(D)** and GZMB<sup>+</sup> GZMK<sup>+</sup> NK cells **(E)**  
 648 before and after LT. Scale bar = 50  $\mu$ M. **(F)** Correlation of genome-wide expression  
 649 profiling for nine T/NK subtypes before and after LT using the scaled Pearson's  
 650 coefficient. **(G)** Representative DEGs of GZMB<sup>+</sup>GZMK<sup>+</sup> NK and MAIT cells and the  
 651 top enriched pathways and processes according to the DEGs ( $P < 0.05$ ). The expression  
 652 level is the normalized count, namely the log<sub>10</sub> value.  
 653

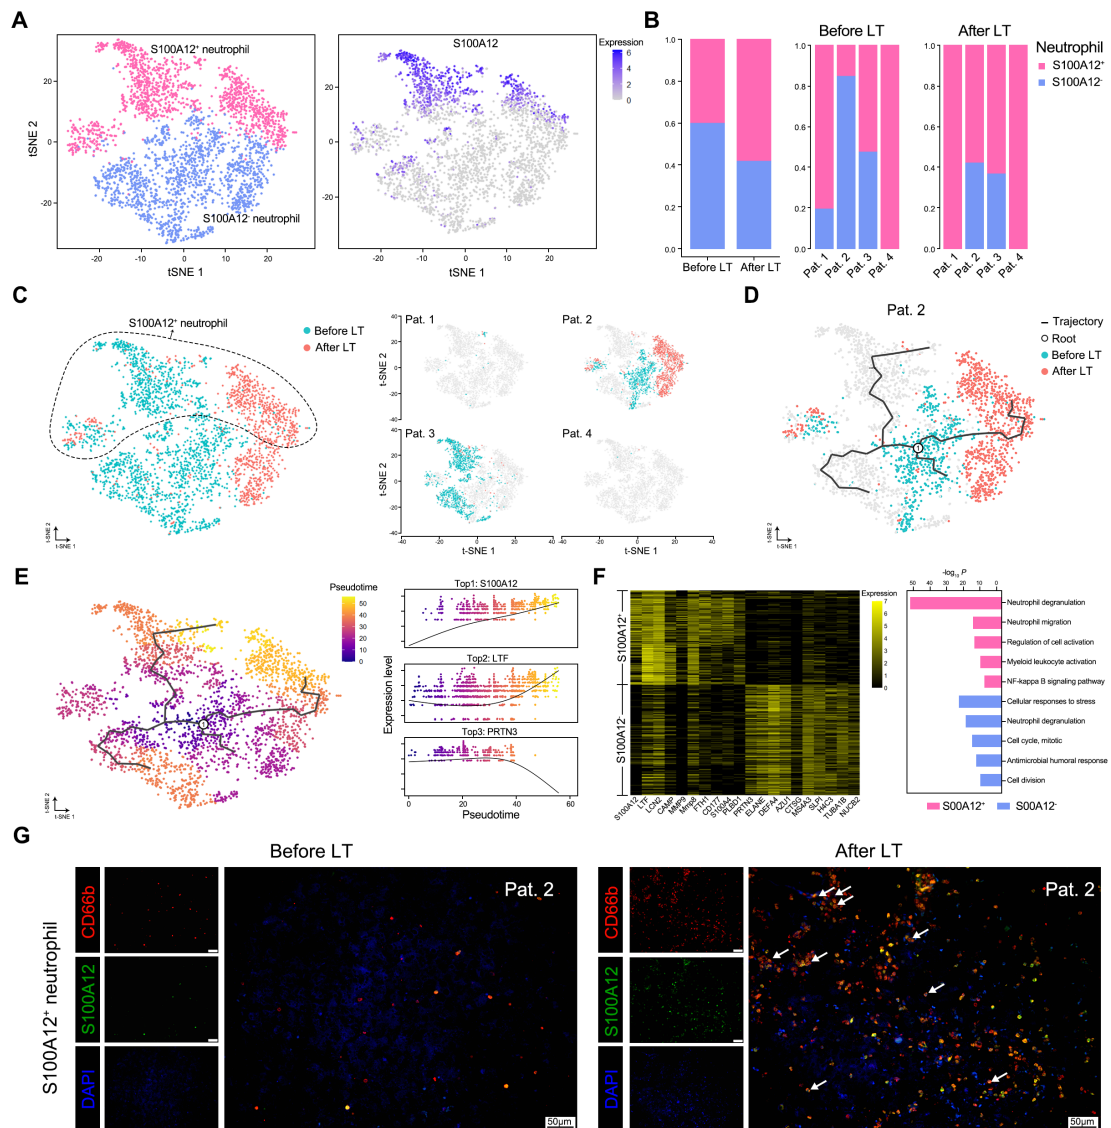

654

655 **Fig. 3** Function and trajectory analysis of neutrophils subtypes. **(A)** S100A12<sup>+</sup> and  
656 S100A12<sup>-</sup> neutrophil subtypes based on the expression of S100A12. The expression  
657 level is the normalized count, namely the log<sub>1p</sub> value. **(B)** Ratio of cell number for the  
658 two neutrophil subtypes among neutrophils. **(C)** Composition of two subtypes of  
659 neutrophils across four patients before and after LT. **(D)** Single-cell trajectory analysis  
660 of neutrophils before and after LT highlighted for pat. 2. **(E)** Pseudotime trajectory  
661 reconstruction and the top 3 significantly correlated genes that cells use to navigate the  
662 decision over pseudotime. **(F)** Representative DEGs of S100A12<sup>+</sup> and S100A12<sup>-</sup>  
663 neutrophil and the top enriched pathways and processes according to the DEGs ( $P <$   
664 0.05). **(G)** Immunofluorescent staining of S100A12<sup>+</sup> neutrophils before and after LT.  
665 Scale bar = 50  $\mu$ M.  
666

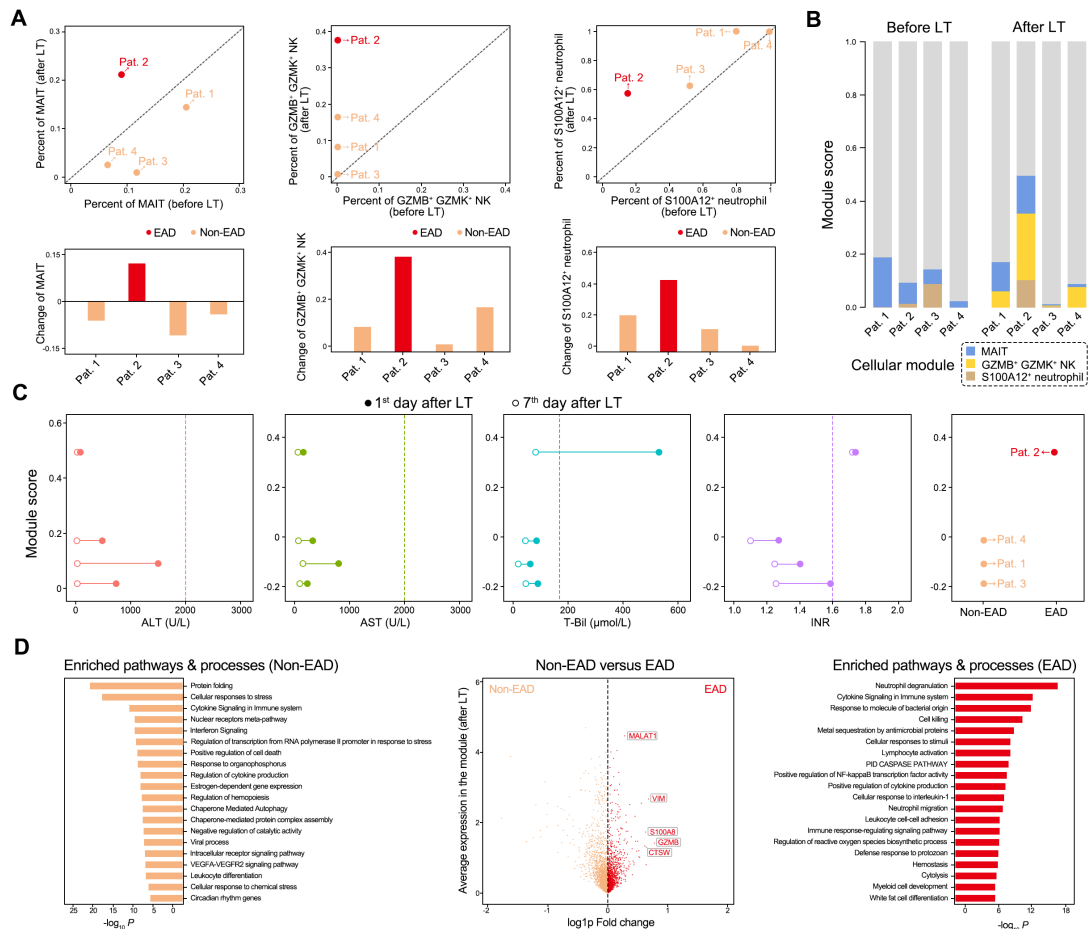

667

668 **Fig. 4** Association of the cellular module consisting of MAIT, GZMB<sup>+</sup> GZMK<sup>+</sup> NK

669 cell, and S100A12<sup>+</sup> neutrophil with EAD. (A) Percentage change of MAIT, GZMB<sup>+</sup>

670 GZMK<sup>+</sup> NK cell, and S100A12<sup>+</sup> neutrophil before and after LT. (B) Module score

671 across four patients before and after LT. (C) Relationship of the cellular module with

672 the biochemical indicators including the ALT, AST, T-Bil, and INR of four patients on

673 the 1st and 7th day after LT. (D) DEGs of the cellular module in the EAD patient and

674 the Non-EAD patients and the top enriched pathways and processes according to the

675 DEGs ( $P < 0.05$ ).

676

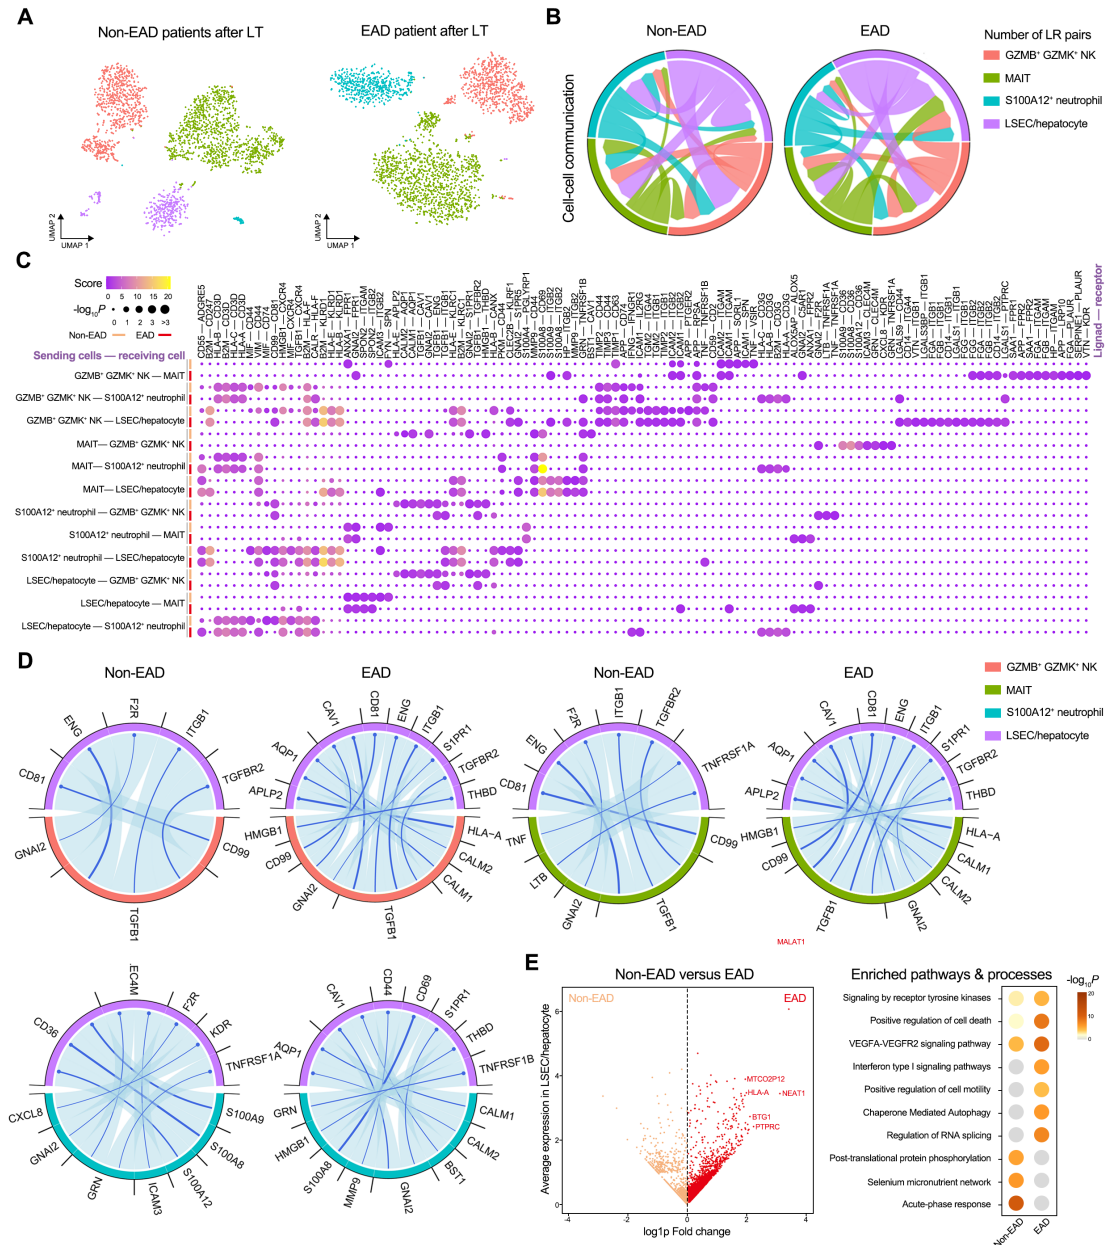

677

678 **Fig. 5** Cell-cell communications analysis of the cellular module. **(A)** Composition of  
 679 the cellular module consisting of MAIT, GZMB<sup>+</sup> GZMK<sup>+</sup> NK cell, and S100A12<sup>+</sup>  
 680 neutrophil as well as LSEC/hepatocytes in the EAD and Non-EAD patients. **(B)**  
 681 Number of enriched ligand-receptor pairs between pairwise cell types of MAIT,  
 682 GZMB<sup>+</sup> GZMK<sup>+</sup> NK cell, S100A12<sup>+</sup> neutrophil, and LSEC/hepatocyte (right). **(C)**  
 683 Enriched ligand-receptor pairs between pairwise cell types. **(D)** Significantly enriched  
 684 ligand-receptor pairs from the sending cell types in the module to the receiving cell

685 types. (E) DEGs of the LSECs in the EAD patient and the Non-EAD patients and the  
 686 top enriched pathways and processes according to the DEGs ( $P < 0.05$ ).

687

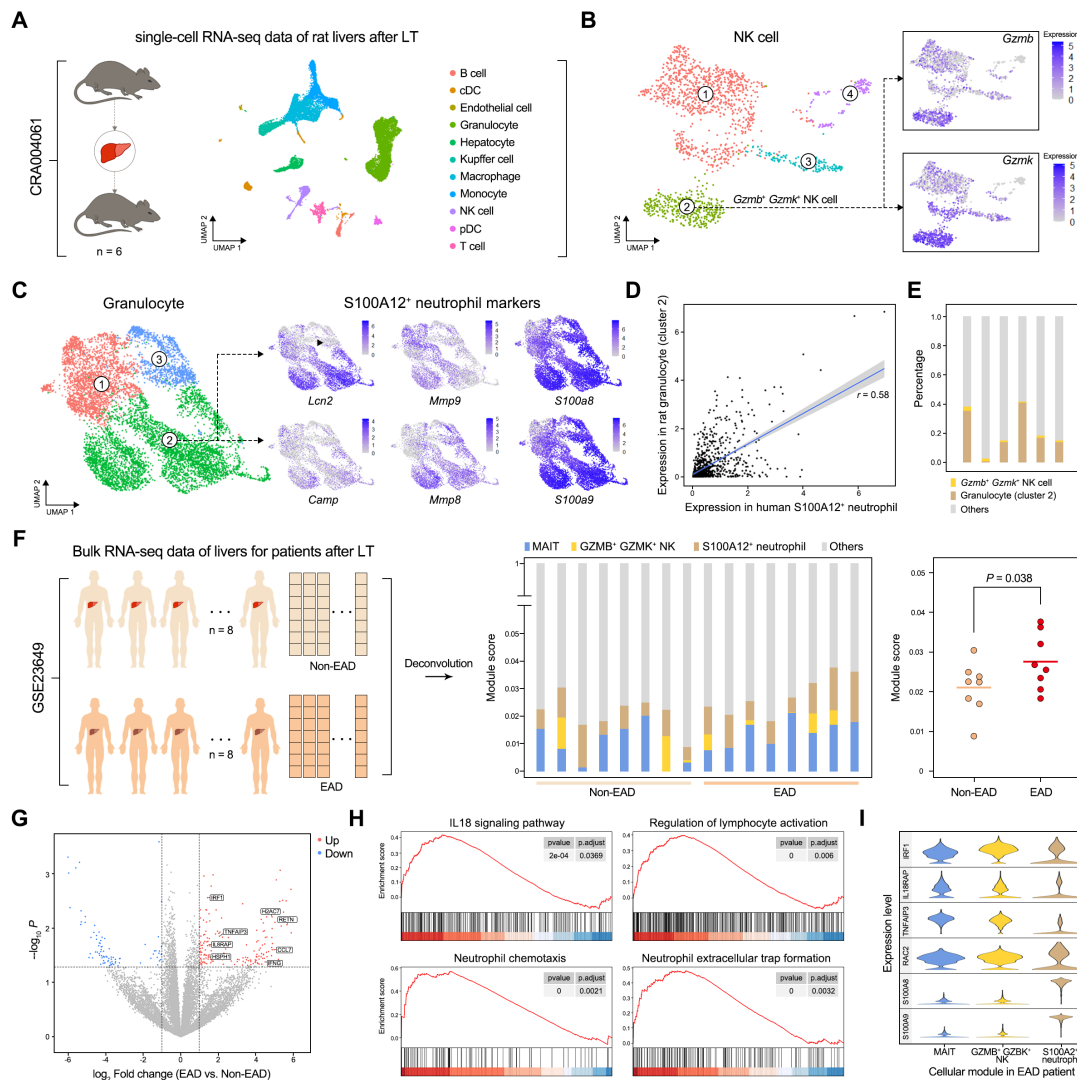

688

689 **Fig. 6** Validation of EAD-associated pathogenic cellular module. (A) Cell type  
 690 composition of the single-cell RNA-seq dataset of six rat livers after LT. (B) Subtype  
 691 analysis of *Gzmb*<sup>+</sup> *Gzmk*<sup>+</sup> NK cells in rat liver. The expression level is the normalized  
 692 count, namely the log1p value. (C) Subtype analysis of granulocytes in rat liver with  
 693 known marker genes. (D) Correlation between human *S100A12*<sup>+</sup> neutrophils and rat  
 694 granulocytes cluster 2. (E) Ratio of cell number for GZMB<sup>+</sup> GZMK<sup>+</sup> NK cells and



695 granulocytes cluster 2 among all cells for each rat. **(F)** Deconvolution of the bulk RNA-  
696 seq data of livers for 8 EAD and 8 Non-EAD patients after LT with RCTD by taking  
697 the scRNA-seq profiles of this study as the reference (left); The predicted percentage  
698 of the cellular module across 8 EAD patients and 8 Non-EAD patients (middle);  
699 Difference of the module percent between the EAD and Non-EAD patients after LT. *P*  
700 value was calculated with one-tailed Welch's *t* test. **(G)** Volcano plot shows DEGs of  
701 the cellular module in the EAD and Non-EAD patients. The red represents up-regulated  
702 genes in EAD patients, while the blue represents up-regulated genes in Non-EAD  
703 patients. **(H)** Top enriched pathways and processes with Gene set enrichment analysis  
704 (GSEA,  $P < 0.05$ ). **(I)** Expression level of genes related with top enriched pathways and  
705 processes across MAIT, GZMB<sup>+</sup> GZMK<sup>+</sup> NK cells, and S100A12<sup>+</sup> neutrophils in our  
706 single-cell RNA-seq data.

707

708 **Table 1.** Characteristics of donor livers and recipients.

| Characteristics  | Donors (n = 4)     |             |         |         |
|------------------|--------------------|-------------|---------|---------|
|                  | 1                  | 2           | 3       | 4       |
| Age              | 40                 | 20          | 64      | 32      |
| Sex              | Male               | Male        | Female  | Male    |
| Graft weight (g) | 950                | 1000        | 1000    | 1800    |
| CIT (h)          | 8                  | ND          | 7       | 8       |
| Viral hepatitis  | No                 | No          | No      | No      |
| Characteristics  | Recipients (n = 4) |             |         |         |
|                  | 1                  | 2           | 3       | 4       |
| Age              | 63                 | 62          | 65      | 53      |
| Sex              | Male               | Male        | Female  | Male    |
| BMI              | 19.96              | 23.88       | 25.43   | 20.28   |
| High MELD        | 39                 | 36          | 40      | 39      |
| Operative time   | 5h14min            | 5h51min     | 6h29min | 4h46min |
| Current state    | Alive              | Passed away | Alive   | Alive   |

709 CIT, Cold Ischemia Time; BMI, Body Mass Index; MELD, Model for End-stage Liver

710 Disease; High MELD, preoperative MELD score >30.

711

712 **Table 2.** Biochemical parameters related to EAD definition before or after liver  
 713 transplantation in four patients.

| Patient No. | EAD | Time                    | Characteristics |     |     |      |
|-------------|-----|-------------------------|-----------------|-----|-----|------|
|             |     |                         | ALT             | AST | TB  | INR  |
|             |     | 1-3 days before surgery | 53              | 38  | 44  | 1.29 |
| 1           | No  | Postoperative day 1     | 1486            | 771 | 61  | 1.4  |
|             |     | Postoperative day 7     | 23              | 106 | 17  | 1.25 |
|             |     | 1-3 days before surgery | 67              | 60  | 744 | 1.69 |
| 2           | Yes | Postoperative day 1     | 69              | 112 | 528 | 1.74 |
|             |     | Postoperative day 7     | 20              | 29  | 80  | 1.73 |
|             |     | 1-3 days before surgery | 68              | 25  | 34  | 1.29 |
| 3           | No  | Postoperative day 1     | 716             | 198 | 89  | 1.59 |
|             |     | Postoperative day 7     | 25              | 52  | 46  | 1.26 |
|             |     | 1-3 days before surgery | 44              | 26  | 71  | 1.46 |
| 4           | No  | Postoperative day 1     | 455             | 297 | 82  | 1.27 |
|             |     | Postoperative day 7     | 16              | 43  | 42  | 1.1  |

714 EAD definition: AST/ALT > 2000 U/L with seven days after surgery, T-Bil  $\geq$  171  
 715  $\mu$ mol/L (10md/dL), or INR  $\geq$  1.6 on the postoperative day seven.

716

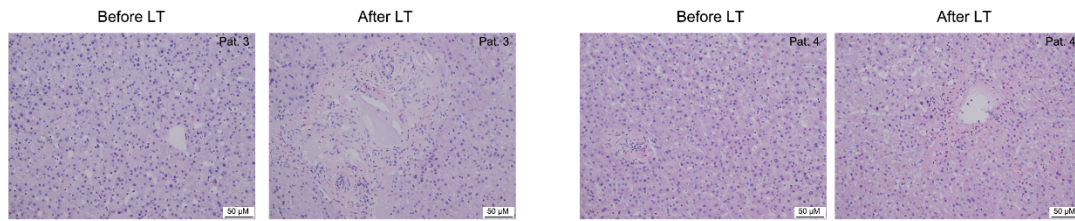

**Fig. S1** Histological staining of transplanted livers of other patients. H&E staining was performed before and after LT. The scale bar = 50  $\mu$ M.

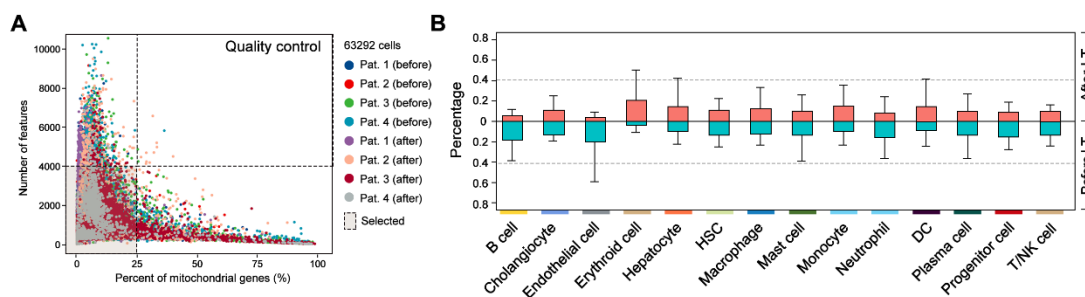

**Fig. S2** Single-cell transcriptomic atlas of human transplanted livers. **(A)** Quality control with the number of unique features (< 4000) and mitochondrial percent (< 25%). **(B)** The bar plot of the percentage of each cell type in each sample across four patients before and after LT, respectively, representing mean  $\pm$  sd.

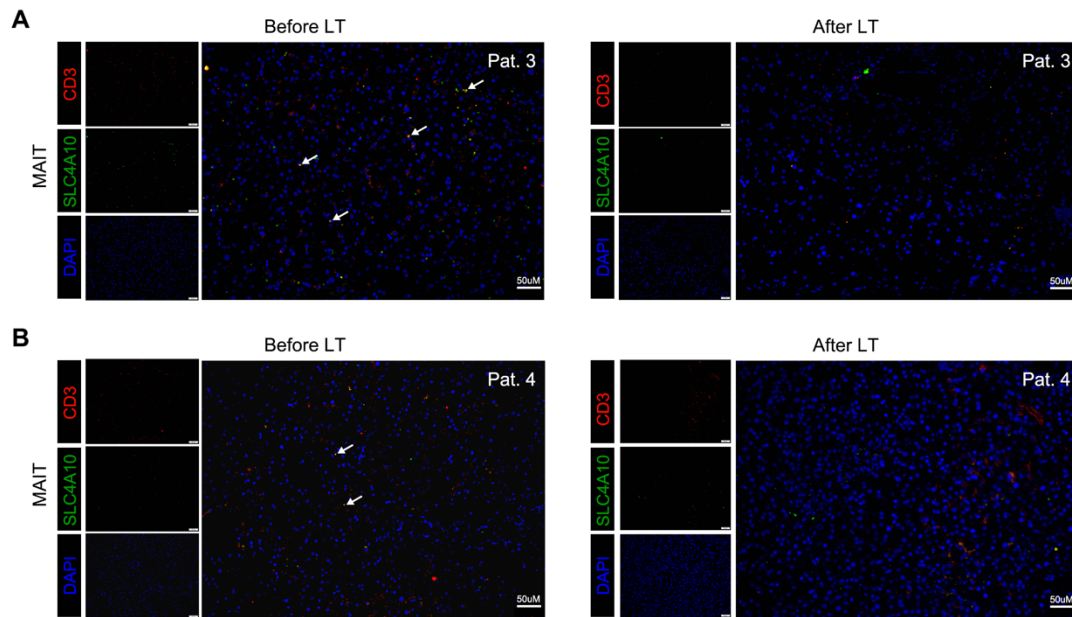

**Fig. S3** Validation of MAIT cell of other patients before and after LT. Immunofluorescent staining of MAIT cells before and after LT in patient 3 (A) and patient 4 (B). Scale bar = 50 μM.

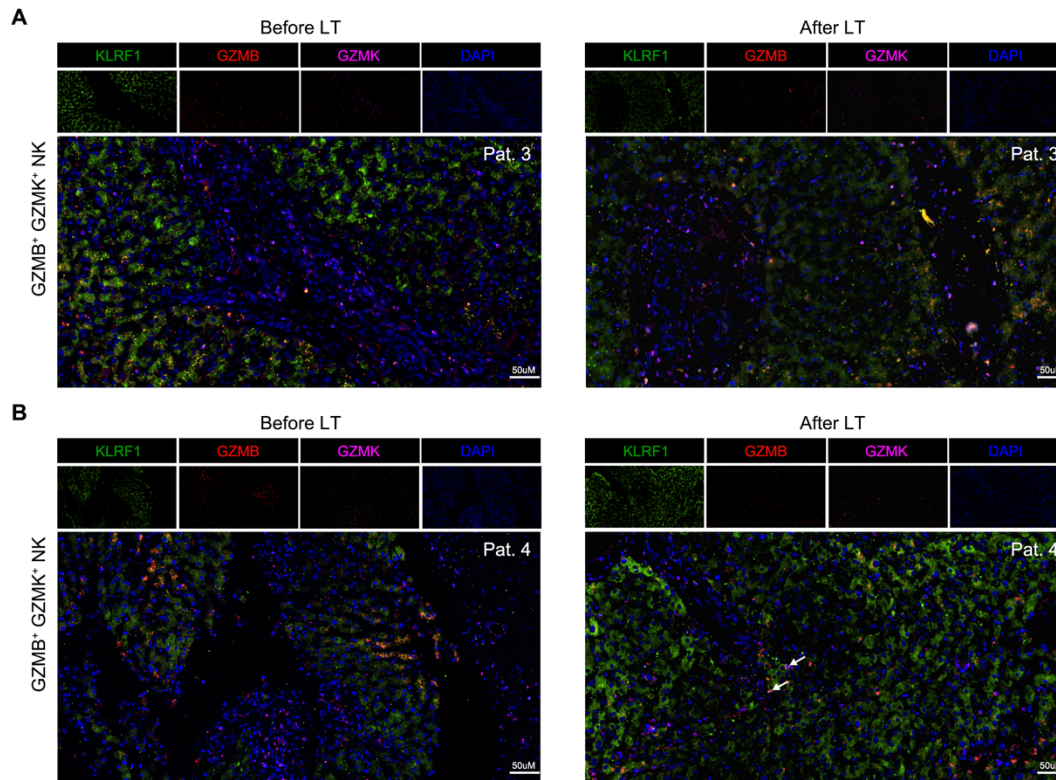

**Fig. S4** Validation of GZMB<sup>+</sup>GZMK<sup>+</sup>NK cell of other patients before and after LT. Immunofluorescent staining of GZMB<sup>+</sup> GZMK<sup>+</sup> NK cells before and after LT in patient 3 (**A**) and patient 4 (**B**). Scale bar = 50  $\mu$ M.

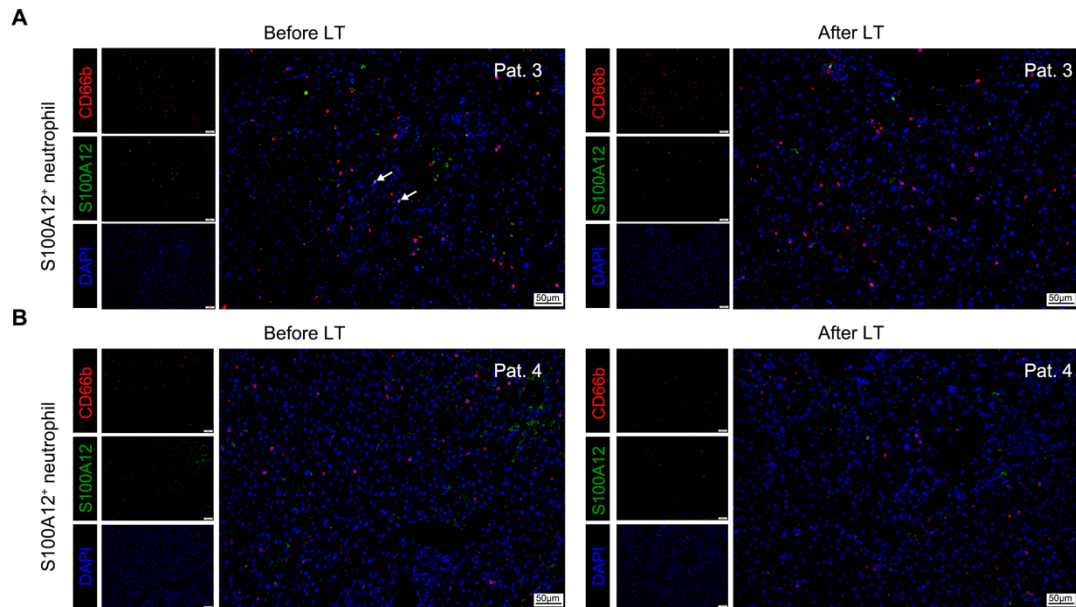

**Fig. S5** Validation of S100A12<sup>+</sup> neutrophils of other patients before and after LT. Immunofluorescent staining of S100A12<sup>+</sup> neutrophils before and after LT in patient 3 (A) and patient 4 (B). Scale bar = 50 µM.

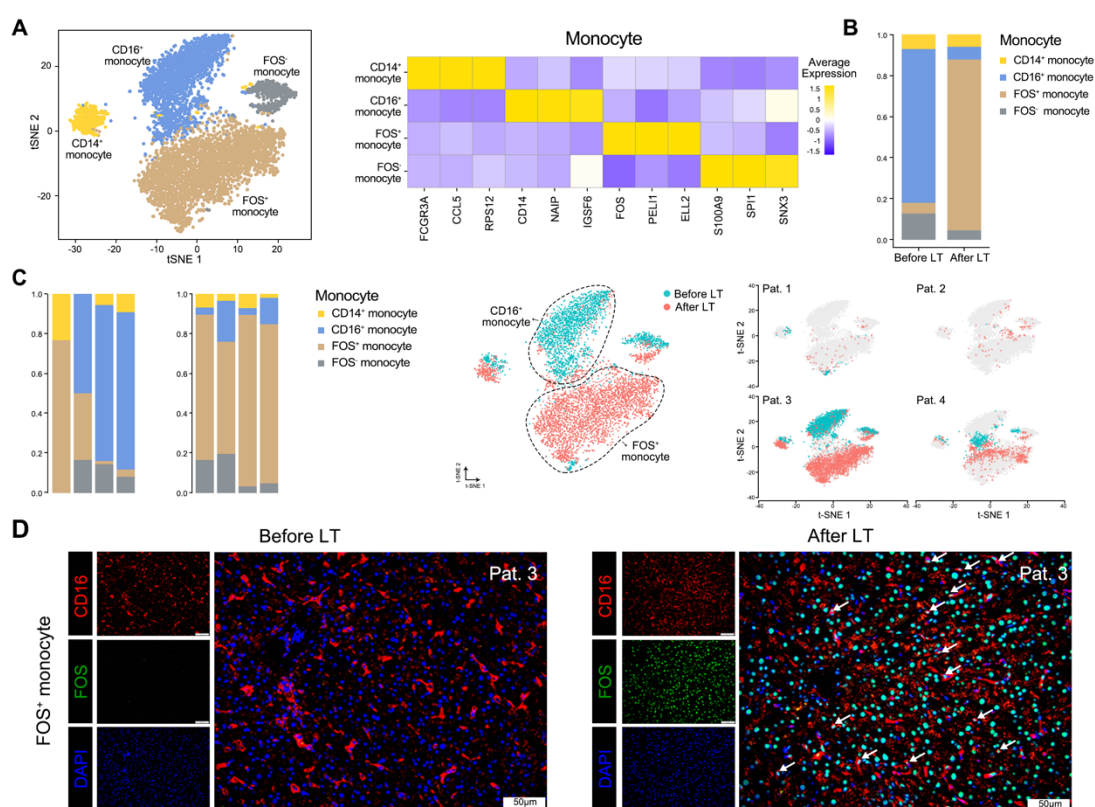

**Fig. S6** Analysis of cell subtypes of monocytes. **(A)** Four subtypes of monocytes, namely CD14<sup>+</sup>, CD16<sup>+</sup>, FOS<sup>+</sup>, and FOS<sup>-</sup> monocytes (left). Known marker genes, e.g., CD14, FCGR3A, and FOS, used to annotate the four subtypes. The color represents the scaled average gene expression level in each subtype (right). **(B)** Ratio of cell number for the four monocyte subtypes before and after LT. **(C)** The composition of four subtypes of monocytes across four patients before and after LT. In the two-dimensional t-SNE plot, the blue represents cells before LT, while the red represents cells after LT. For each patient (right), the grey represents cells from other patients. **(D)** Immunofluorescent staining of FOS<sup>+</sup> monocytes before and after LT. Liver sections were stained with antibodies against CD16 and FOS; DAPI was used for nucleus staining; the scale bar = 50 μM.



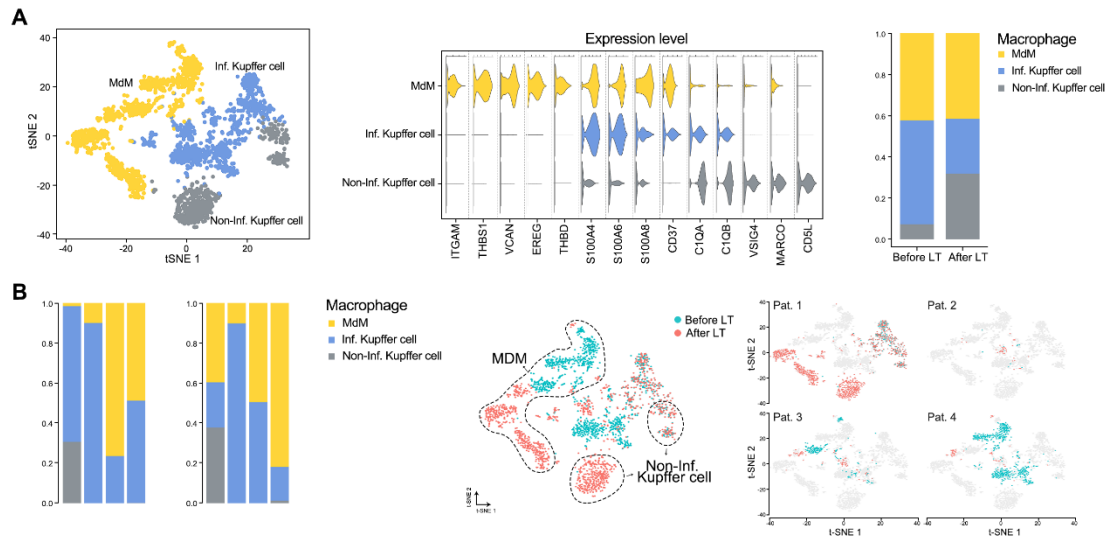

**Fig. S7** Analysis of cell subtypes of macrophages. **(A)** Three subtypes of macrophages, namely monocyte-derived macrophage (M<sub>d</sub>M), Inflammatory (Inf.) Kupffer cell, and Non-inflammatory (Non-Inf.) Kupffer cell. Known marker genes for three subtypes of macrophages (middle). The expression level is the normalized count, namely the log<sub>1p</sub> value. Ratio of cell number for the three macrophage subtypes before and after LT (right). **(B)** The composition of three subtypes of macrophages across four patients before and after LT. In the two-dimensional t-SNE plot, the blue represents cells before LT, while the red represents cells after LT. For each patient (right), the grey represents cells from other patients.

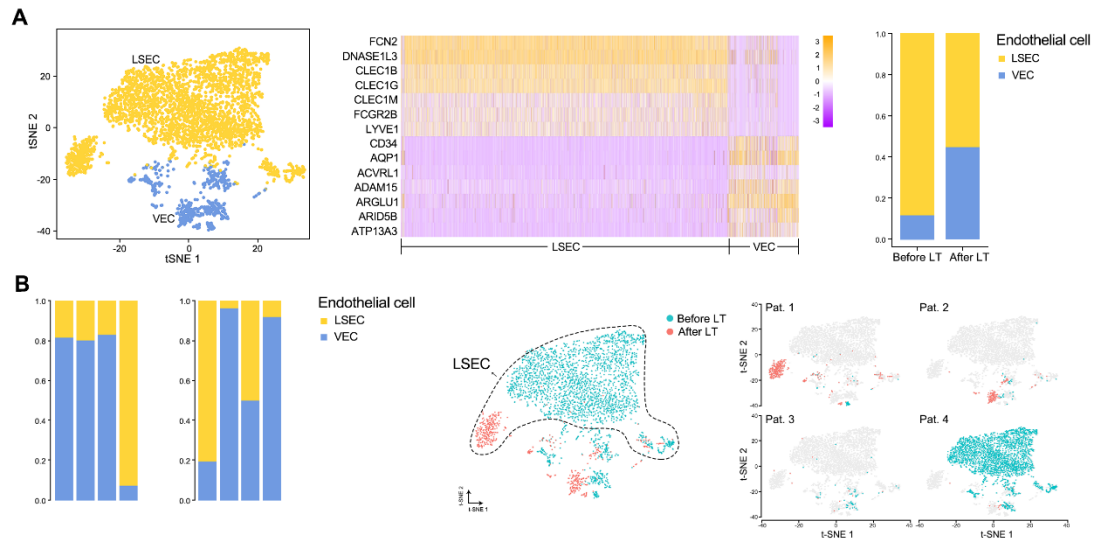

**Fig. S8** Analysis of cell subtypes of endothelial cells. **(A)** Two subtypes of endothelial cells, namely liver sinusoidal endothelial cells (LSECs) and vascular endothelial cells (VECs). Known marker genes for two subtypes of endothelial cells (middle). The expression level is the normalized count, namely the  $\log_{1p}$  value. Ratio of cell number for the two endothelial cell subtypes before and after LT (right). **(B)** The composition of two subtypes of endothelial cells across four patients before and after LT. In the two-dimensional t-SNE plot, the blue represents cells before LT, while the red represents cells after LT. For each patient (right), the grey represents cells from other patients.

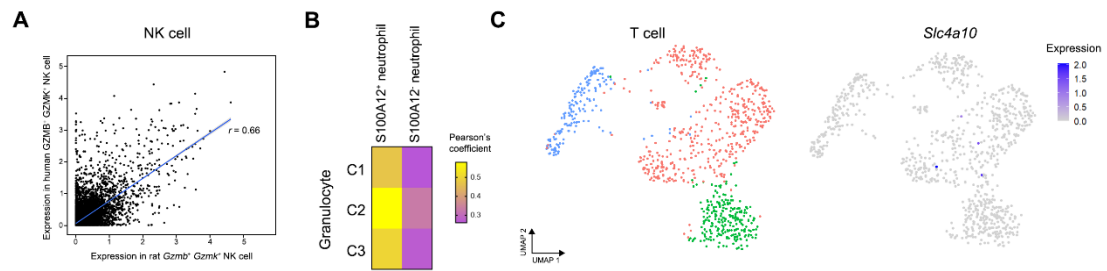

**Fig. S9** Validation of the EAD-associated pathogenic cellular module. **(A)** Correlation between human GZMB<sup>+</sup> GZMK<sup>+</sup> NK cells and rat *Gzmb*<sup>+</sup> *Gzmk*<sup>+</sup> NK cells. **(B)** Clustering analysis of rat T cells and the gene expression of MAIT cell marker *Slc4a10*. The expression level is the normalized count, namely the log<sub>1p</sub> value. **(C)** Pearson's correlation coefficients between human S100A12<sup>+</sup>/S100A12<sup>-</sup> neutrophils and three clusters of rat granulocytes.
